# Supplementary material for: Compositionally variant bimetallic Cu–Mn oxysulfide electrodes with meritorious supercapacitive performance and high energy density
Source: Royal Society of Chemistry journal article supplement (doi:10.1039/d3ya00415e), 2023-01-01
Supplement: d3ya00415e1.pdf [file d3ya00415e1.pdf]

## Compositionally Variant Bimetallic Cu-Mn Oxysulfide Electrodes with Meritorious Supercapacitive Performance and High Energy Density

Heba M. El Sharkawy<sup>a</sup>, Abdussalam M. Elbanna<sup>b,#</sup>, Ghada E. Khedr<sup>a,#</sup> and Nageh K. Allam<sup>b,\*</sup>

<sup>a</sup> Department of Analysis and Evaluation, Egyptian Petroleum Research Institute, Cairo 11727, Egypt

<sup>b</sup> Energy Materials Laboratory (EML), School of Sciences and Engineering, The American University in Cairo, New Cairo 11835, Egypt

\* Corresponding Author's email: [nageh.allam@aucegypt.edu](mailto:nageh.allam@aucegypt.edu)

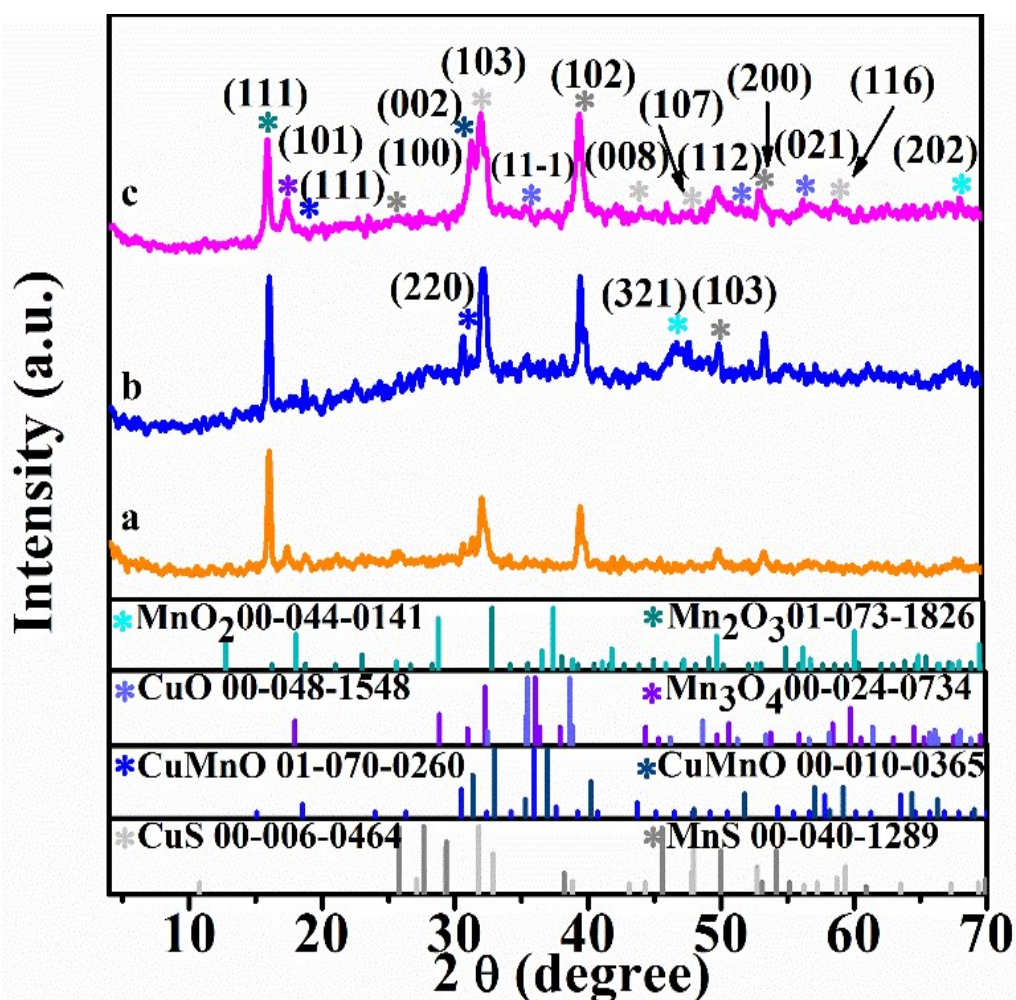

**Figure S1:** XRD patterns of (a) C<sub>1</sub>M<sub>3</sub>OS, (b) C<sub>1</sub>M<sub>1</sub>OS, and (c) C<sub>3</sub>M<sub>1</sub>OS nanocomposites with their corresponding reference cards.

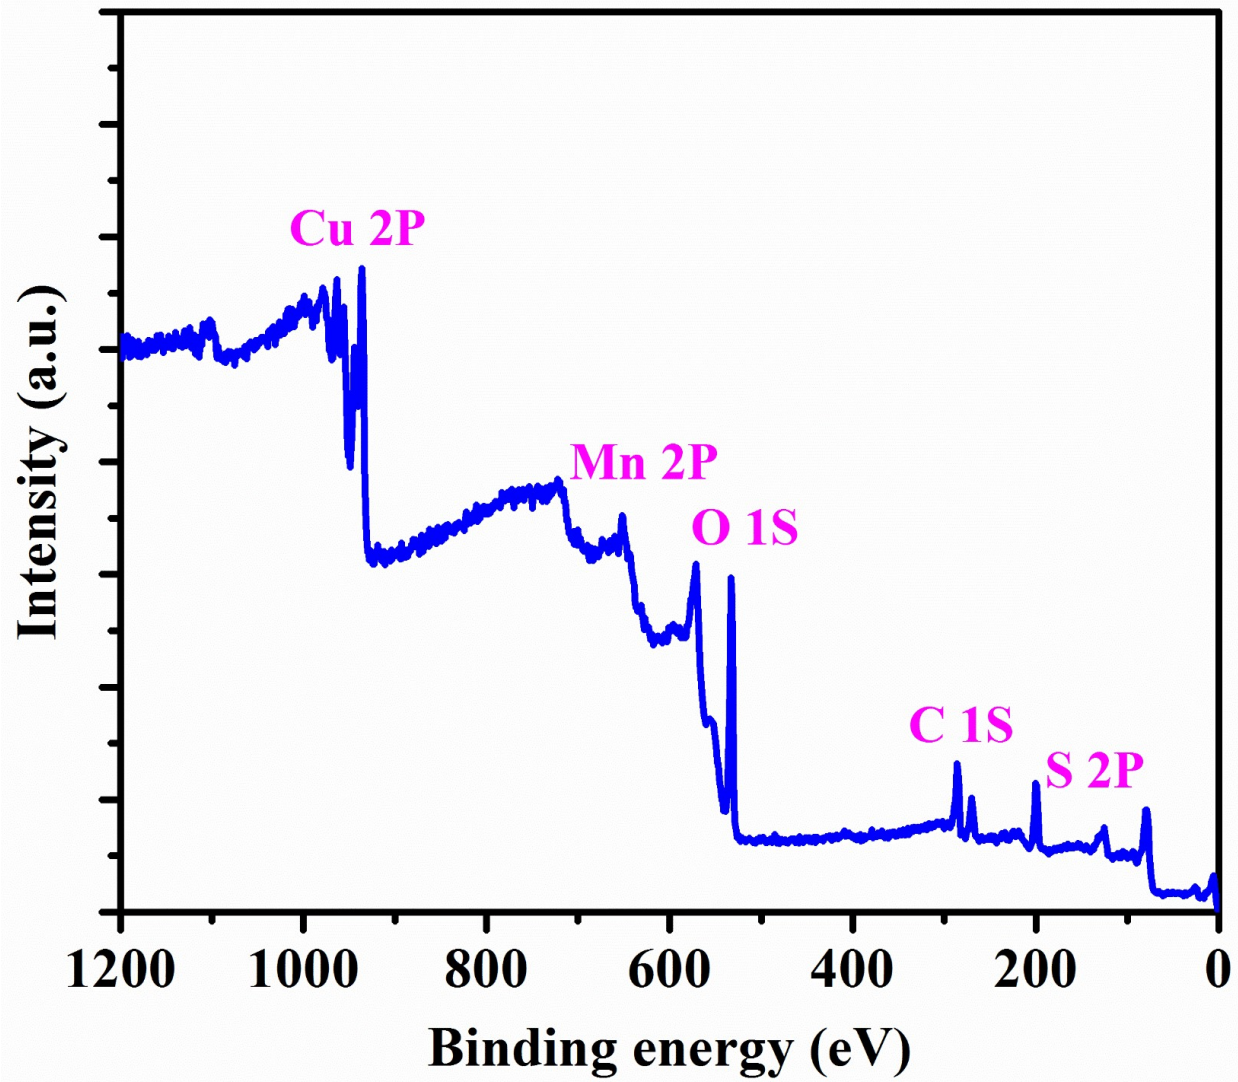

Figure S2: X-ray photoelectron spectroscopy survey scan of the  $C_3M_1OS$  nanocomposite.

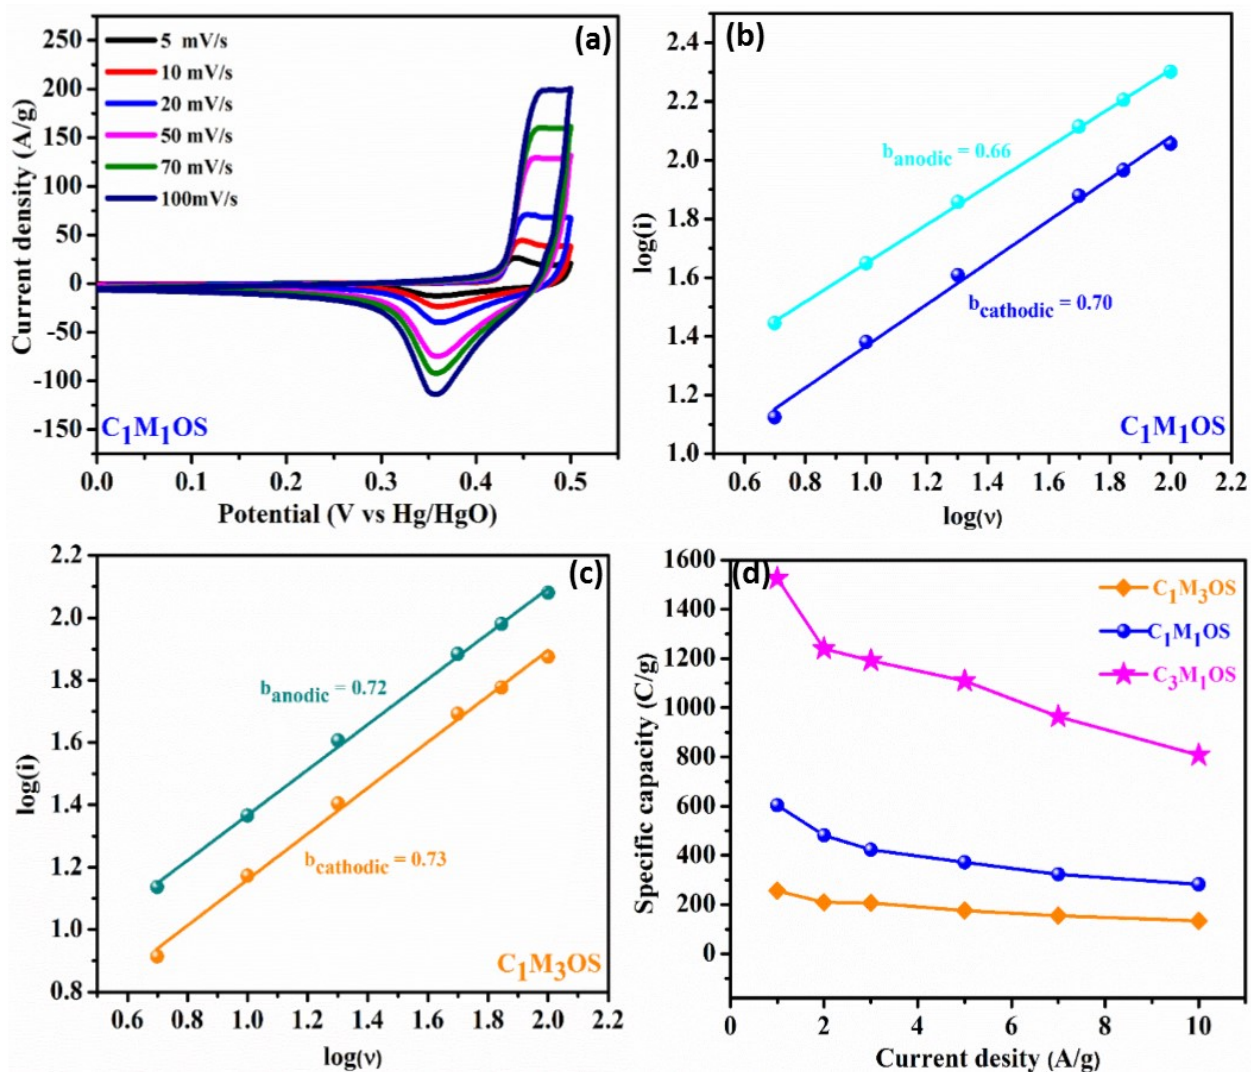

**Figure S3:** Three-electrode electrochemical measurements: (a) CV profile of  $C_1M_1OS$  at various scan rates (5–100 mV/s), The reliance of cathodic and anodic currents on the applied scan rate for (b)  $C_1M_1OS$ , (c)  $C_1M_3OS$ , and (d) specific capacitance recorded at different several scan rates for  $C_1M_3OS$ ,  $C_1M_1OS$ , and  $C_3M_1OS$  electrodes in 2 M KOH.

The electrochemical active surface area (ECSA) was calculated from a series of cyclic voltammograms in the non-faradaic region at different scan rates (3–100 mV/s), as shown in Fig.

7a. The ECSA values can be obtained using the equation  $ECSA = \frac{C_{DL}}{C_s}$ , where  $C_s$  is the specific capacitance of a flat surface of the material per unit area. This specific capacitance is usually between 20 and 60  $\mu\text{F}/\text{cm}^2$  for metal-based materials in alkaline electrolytes; the average value of 40  $\mu\text{F}/\text{cm}^2$  is usually used and  $C_{dl}$  is the electrochemical double-layer capacitance of the Flat surface.<sup>1-3</sup> Based on the obtained  $C_{dl}$  values from the slopes in **Figure S4 b,d,f**, the ESCA was found to be 32, 25, and 17  $\text{cm}^2$   $\text{C}_3\text{M}_1\text{OS}$ ,  $\text{C}_1\text{M}_1\text{OS}$ , and  $\text{C}_1\text{M}_3\text{OS}$  electrodes, respectively. Confirming the superior activity of the fabricated composites and the outstanding electrochemical performance of the  $\text{C}_3\text{M}_1\text{OS}$  electrode.

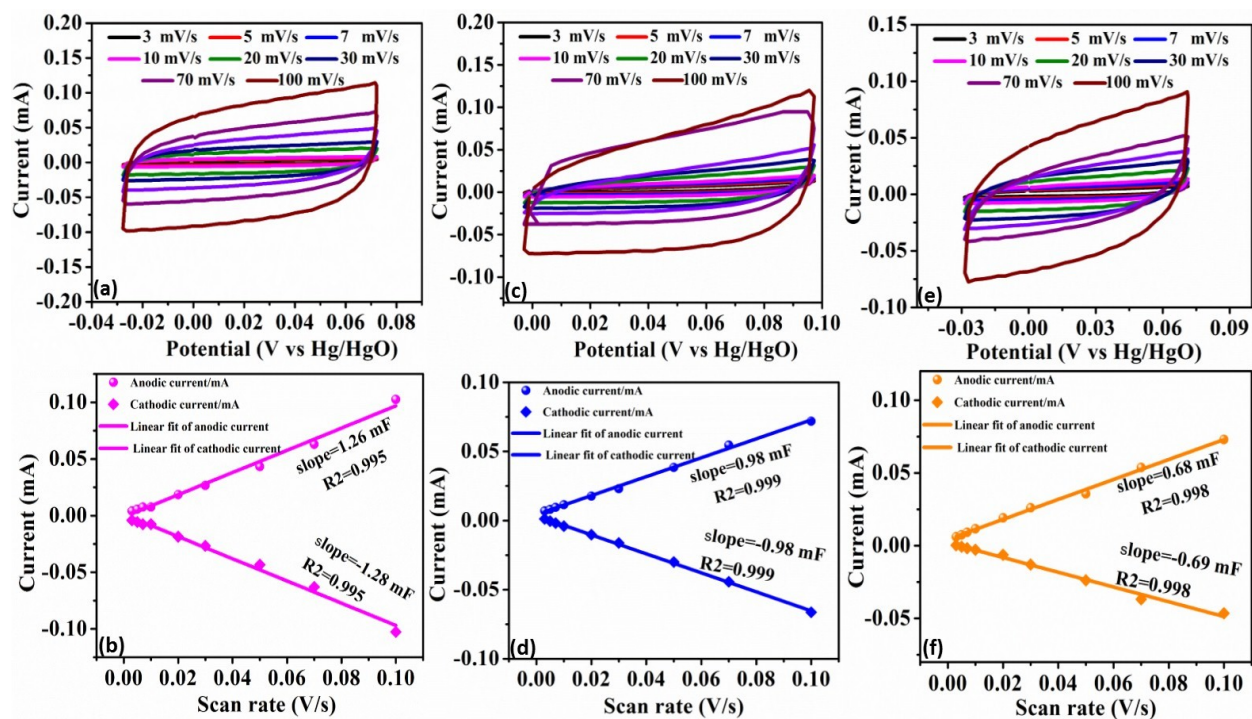

**Figure S4:** The electrochemical surface area measurements: cyclic voltammograms at different scan rates (3–100) mV/s, anodic and cathodic currents as a function of scan rate of the (a, b)  $\text{C}_3\text{M}_1\text{OS}$ , (c, d)  $\text{C}_1\text{M}_1\text{OS}$ , and (e, f)  $\text{C}_1\text{M}_3\text{OS}$  electrodes.

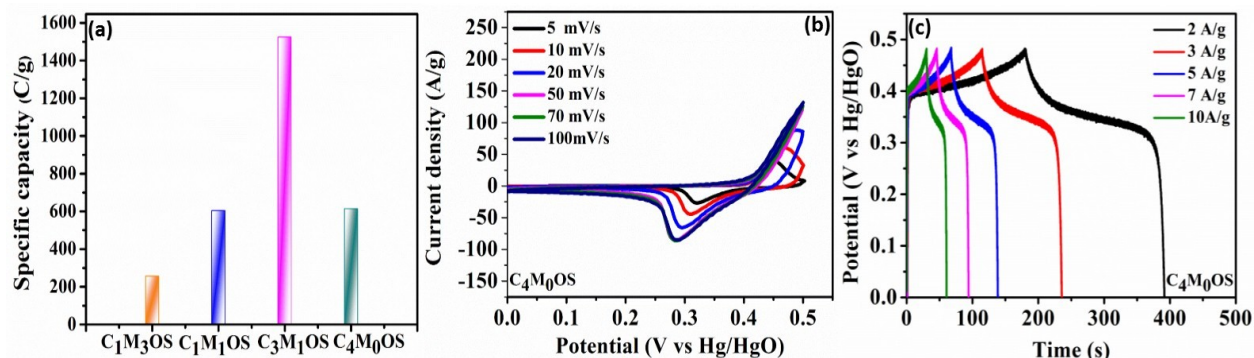

**Figure S5:** Three-electrode electrochemical measurements: (a) specific capacity of the C<sub>1</sub>M<sub>3</sub>OS, C<sub>1</sub>M<sub>1</sub>OS, C<sub>3</sub>M<sub>1</sub>OS and C<sub>4</sub>M<sub>0</sub>OS electrodes at a current density of 1 A/g. (b) CV profiles at various scan rates (5–100 mV/s), and (c) GCD profiles at various current densities (2–10 A/g) of C<sub>4</sub>M<sub>0</sub>OS electrode.

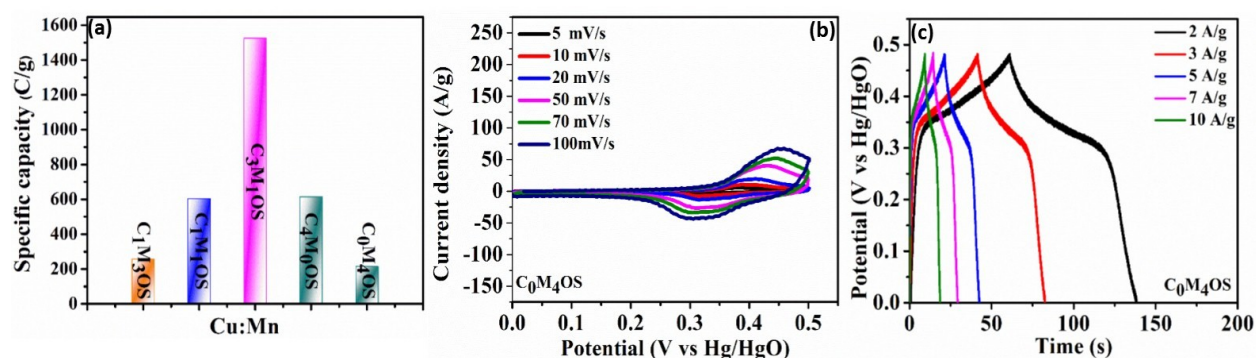

**Figure S6:** Three-electrode electrochemical measurements: (a) specific capacity of the C<sub>1</sub>M<sub>3</sub>OS, C<sub>1</sub>M<sub>1</sub>OS, C<sub>3</sub>M<sub>1</sub>OS, C<sub>4</sub>M<sub>0</sub>OS and C<sub>0</sub>M<sub>4</sub>OS electrodes at a current density of 1 A/g. (b) CV profiles at various scan rates (5–100 mV/s), and (c) GCD profiles at various current densities (2–10 A/g) of C<sub>0</sub>M<sub>4</sub>OS electrode.

### Material characterization of C<sub>3</sub>M<sub>1</sub>OS electrode after cycling

As for the morphology of the electrode after cycling, SEM image (**Figure S7a**) showed the retaining of the nanocube-like structure covered with nanoneedles with the presence of some aggregates. Additionally, EDX and XPS analysis shown in **Figure S7b,c** confirmed the presence of all chemical elements (Cu, Mn, S, and O) after cycling, demonstrating the stability of the C<sub>3</sub>M<sub>1</sub>OS electrode.

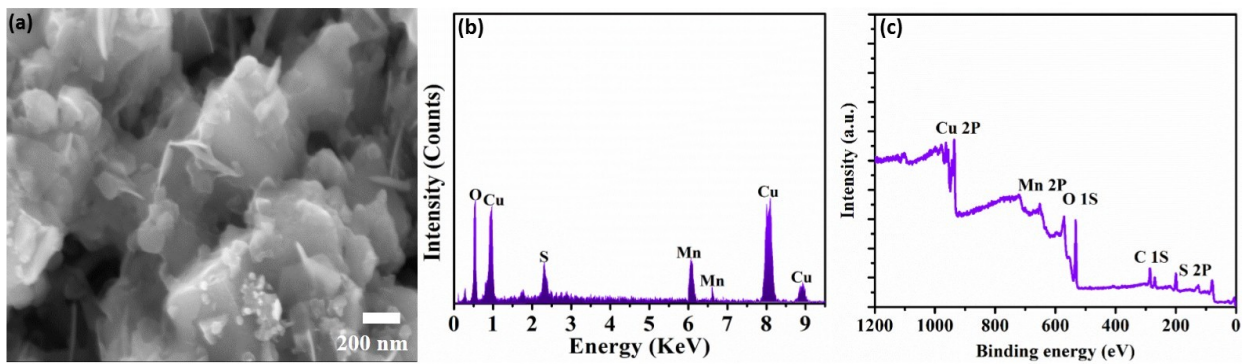

**Figure S7:** (a) field-emission scanning electron microscopy (FESEM) image, (b) the EDX spectrum and (c) X-ray photoelectron spectroscopy survey scan of  $C_3M_1OS$  electrode after cycling.

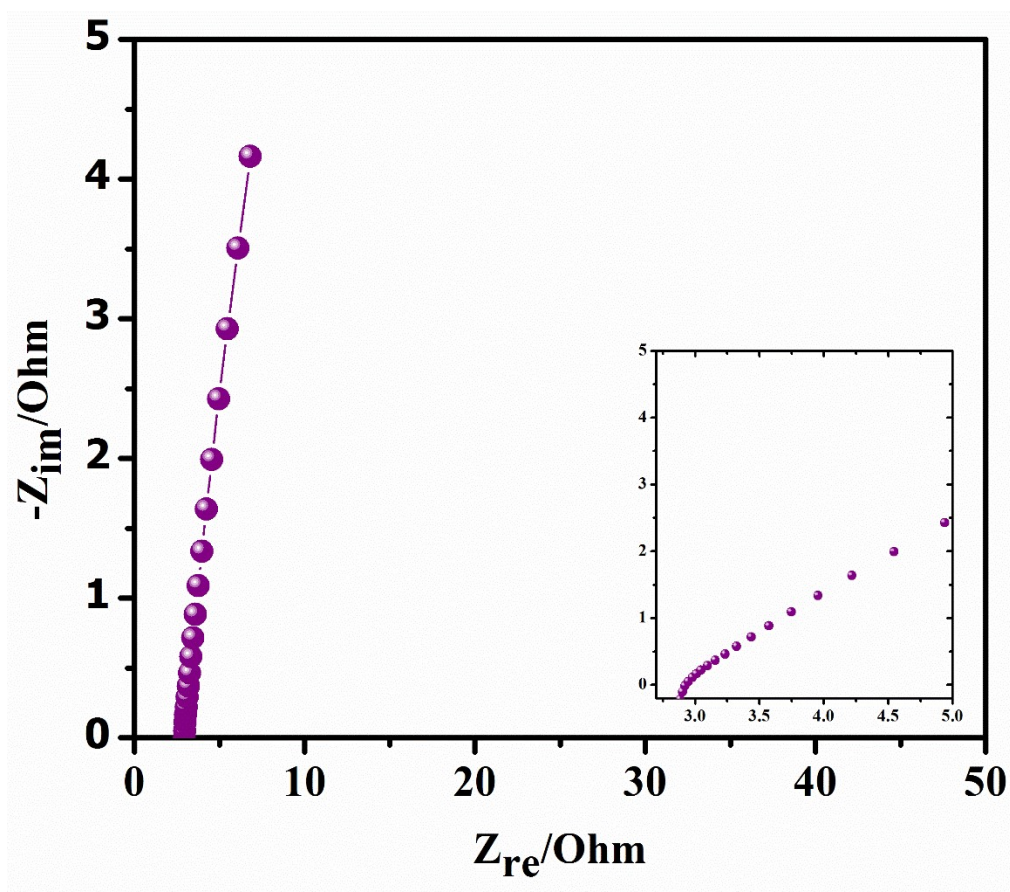

**Figure S8:** Electrochemical characteristics of  $C_3M_1OS//AC$  asymmetric device: (a) Nyquist plots for the designed device.

**Table S1** Bader net atomic charge

| <b>Element</b>  | <b>C<sub>1</sub>M<sub>3</sub>OS</b> | <b>C<sub>1</sub>M<sub>1</sub>OS</b> | <b>C<sub>3</sub>M<sub>1</sub>OS</b> |
|-----------------|-------------------------------------|-------------------------------------|-------------------------------------|
| Cu              | 0.413269                            | 0.480593                            | 0.514096                            |
| Cu              | ---                                 | 0.490029                            | 0.532672                            |
| Cu              | ---                                 | ---                                 | 0.895732                            |
| Mn              | 1.041738                            | 1.61466                             | 1.75898                             |
| Mn              | 1.577323                            | 1.614569                            | ---                                 |
| Mn              | 1.577179                            | ---                                 | ---                                 |
| O               | -1.329480                           | -1.268808                           | -1.117837                           |
| O               | -1.329707                           | -1.268761                           | -1.117261                           |
| S               | -0.975155                           | -0.831103                           | -0.712779                           |
| S               | -0.975167                           | -0.83118                            | -0.753602                           |
| No of electrons | 56                                  | 60                                  | 64                                  |

Bader net atomic charge =ZVAL-Bader population
